# Supplementary material for: Ascophyllum nodosum polysaccharide regulates gut microbiota metabolites to protect against colonic inflammation in mice
Source: Royal Society of Chemistry journal article supplement (doi:10.1039/d2fo02964b), 2022-12-22

1

## Supplementary information

2 *Ascophyllum nodosum* polysaccharide regulates gut microbiota metabolites to

3

**protect against colonic inflammation in mice**

4

5 Lilong Wang<sup>1</sup>, Chunhong Yan<sup>1</sup>, Linlin Wang<sup>1</sup>, Chunqing Ai<sup>1</sup>, Songtao Wang<sup>2</sup>, Caihong Shen<sup>2</sup>,

6 Yuqin Tong<sup>2</sup>, Shuang Song<sup>1,\*</sup>

7

8 **Table S1.** Identification results of differential metabolites between the Blank and ANP groups.

9 **Fig. S1.** PLS-DA (A), OPLS-DA (B), and permutation test analysis of ANP and Blank groups in

10 positive model (C) and negative model (D).

11 **Table S1.** Identification results of differential metabolites between the Blank and ANP groups.

| No. | Metabolite                         | Formula    | VIP  | Mode |
|-----|------------------------------------|------------|------|------|
| 1   | Cholic acid                        | C24H40O5   | 2.97 | -    |
| 2   | Deoxycholic acid                   | C24H40O4   | 2.23 | -    |
| 3   | Vaccenic acid                      | C18H34O2   | 2.06 | -    |
| 4   | L-Leucine                          | C6H13NO2   | 1.65 | -    |
| 5   | Undecanoic acid                    | C11H22O2   | 1.44 | -    |
| 6   | Linoleic acid                      | C18H32O2   | 1.06 | -    |
| 7   | Chenodeoxycholic acid              | C24H40O4   | 5.23 | +    |
| 8   | Cholic acid                        | C24H40O5   | 2.56 | +    |
| 9   | Deoxycholic acid                   | C24H40O4   | 2.23 | +    |
| 10  | Brassinolide                       | C28H48O6   | 2.22 | +    |
| 11  | D-Alloisoleucine                   | C6H13NO2   | 1.70 | +    |
| 12  | Glabrol                            | C25H28O4   | 1.69 | +    |
| 13  | Lithocholic acid                   | C24H40O3   | 1.64 | +    |
| 14  | Hernandezine                       | C39H44N2O7 | 1.54 | +    |
| 15  | Platyphylline                      | C18H27NO5  | 1.50 | +    |
| 16  | Saikosaponin E                     | C42H68O12  | 1.39 | +    |
| 17  | 2-Acetoxy-4-pentadecylbenzoic acid | C24H38O4   | 1.36 | +    |
| 18  | Erucamide                          | C22H43NO   | 1.35 | +    |
| 19  | Miltirone                          | C19H22O2   | 1.23 | +    |
| 20  | Pyrrolidine                        | C4H9N      | 1.10 | +    |
| 21  | 2-Piperidone                       | C5H9NO     | 1.07 | +    |
| 22  | Picfeltarraenin IA                 | C41H62O13  | 1.06 | +    |

13 Fig. S1

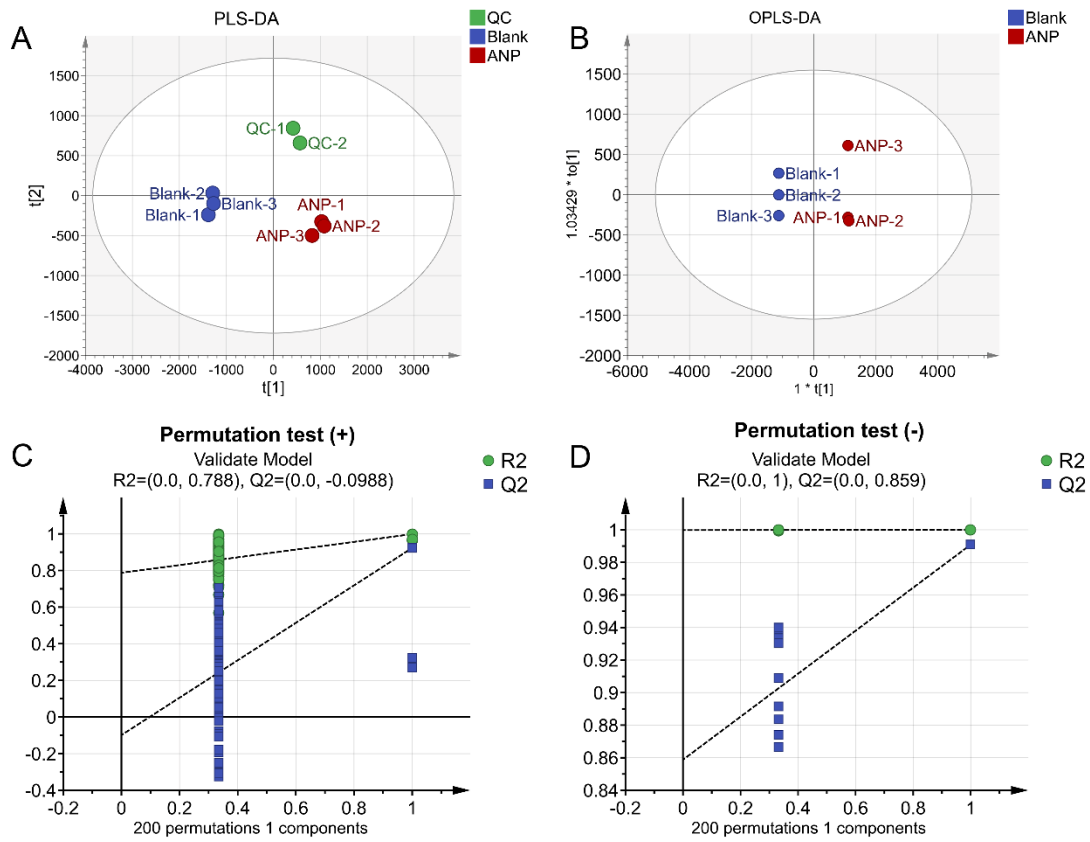

Supplement: d2fo02964b1.pdf [file d2fo02964b1.pdf]
